# Supplementary material for: Super-tough self-healable multiphasic supramolecular plastic via sequence-biased statistical copolymerization
Source: Royal Society of Chemistry journal article supplement (doi:10.1039/d3ta05808e), 2023-11-07
Supplement: d3ta05808e1.pdf [file d3ta05808e1.pdf]

*Supporting Information*

**Super-Tough Self-Healable Multiphase Supramolecular Plastic  
via Sequence-Biased Statistical Copolymerization**

*Woojin Lee<sup>a,b</sup>, Yeong Jun Yu<sup>c</sup>, Haisu Kang<sup>d</sup>, Sung Hyun Kwon<sup>e</sup>, Seung Geol Lee<sup>e,f</sup>,*

*Jae Woo Chung<sup>g,\*</sup>, and Seung-Yeop Kwak<sup>a,b,g,\*</sup>*

<sup>a</sup> Department of Materials Science and Engineering, Seoul National University, 1 Gwanak-ro,  
Gwanak-gu, Seoul 08826, Republic of Korea

<sup>b</sup> Institute of Engineering Research, Seoul National University, 1 Gwanak-ro, Gwanak-gu, Seoul  
08826, Republic of Korea

<sup>c</sup> Department of Materials Science and Engineering, Soongsil University, 369 Sangdo-ro, Dongjak-gu,  
Seoul, 06978, Republic of Korea

<sup>d</sup> Department of Chemical and Biomolecular Engineering, University of Illinois at Urbana-  
Champaign, Urbana, IL 61801, United States

<sup>e</sup> School of Chemical Engineering, Pusan National University, Busan 46241, Republic of Korea

<sup>f</sup> Department of Organic Material Science and Engineering, Pusan National University, 63  
Busandaehak-ro, Geumjeong-gu, Pusan, 46288, Republic of Korea

<sup>g</sup> Research Institute of Advanced Materials (RIAM), Seoul National University, 1 Gwanak-ro,  
Gwanak-gu, Seoul 08826, Republic of Korea

\* Corresponding authors: **Jae Woo Chung** (E-mail: [jwchung@ssu.ac.kr](mailto:jwchung@ssu.ac.kr))

Tel: +82-2-828-7047, Fax: +82-2-817-8346

**Seung-Yeop Kwak** (E-mail: [sykwak@snu.ac.kr](mailto:sykwak@snu.ac.kr))

Tel.: +82-2-880-8365, Fax: +82-2-885-1748

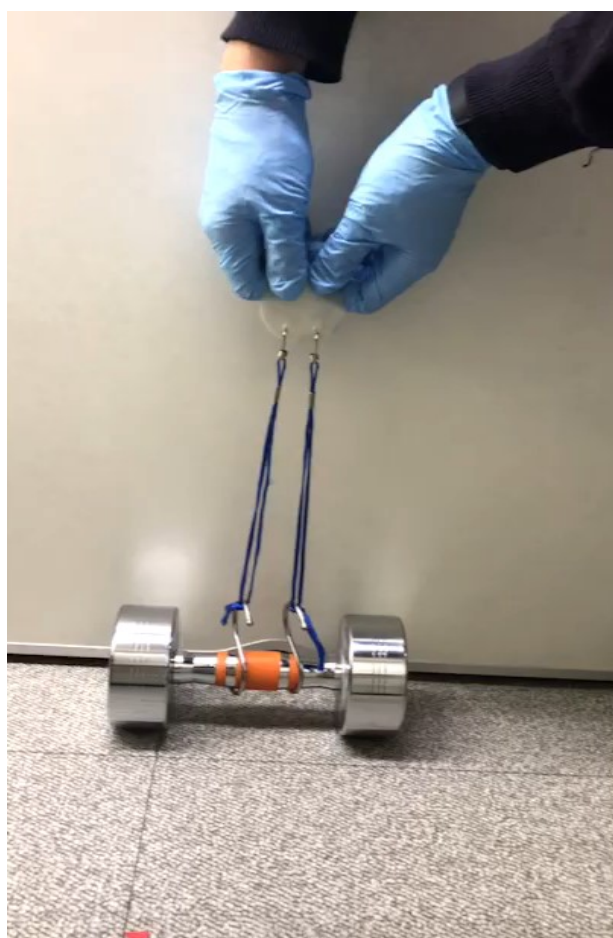

**Video S1.** A video file of the healed USPCD92 enduring a 5-kg dumbbell without any subtle deformation. This video displays the mechanical robustness of healed USPCD92 disk (treated at 50 °C for 10 min) sample when subjected to a high tensile loading. Remarkably, the healed USPCD92 bulk disk lifted a 5-kg dumbbell while maintaining its healed state and original shape.

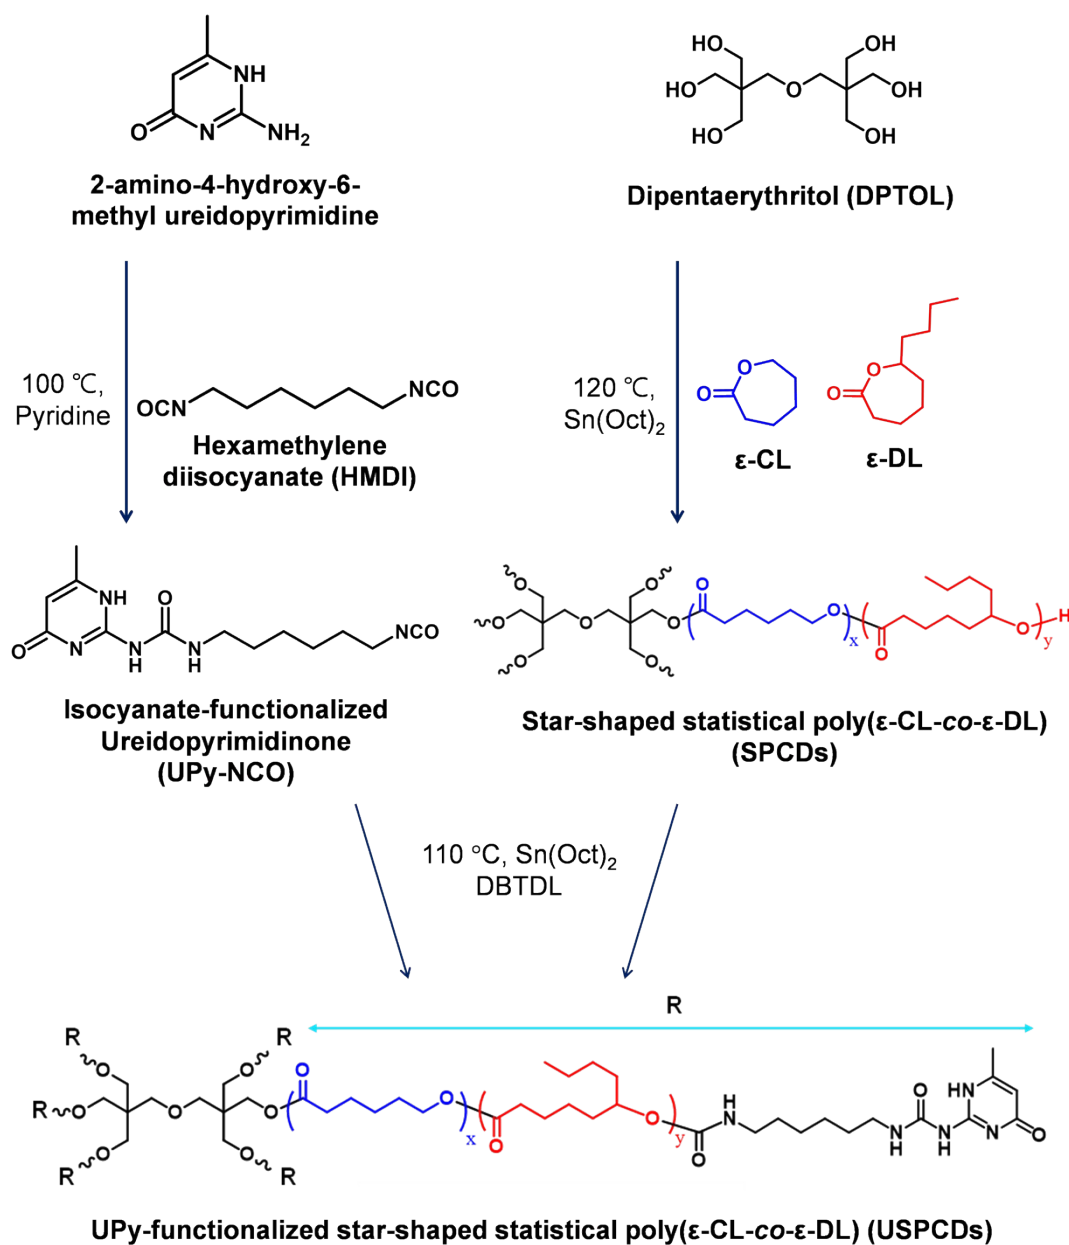

**Figure S1.** Synthetic routes for UPy-NCO, star-shaped poly(ε-caprolactone-co-ε-decalactone)s (SPCDs), and UPy-end functionalized star-shaped poly(ε-caprolactone-co-ε-decalactone)s (USPCDs).

(a)

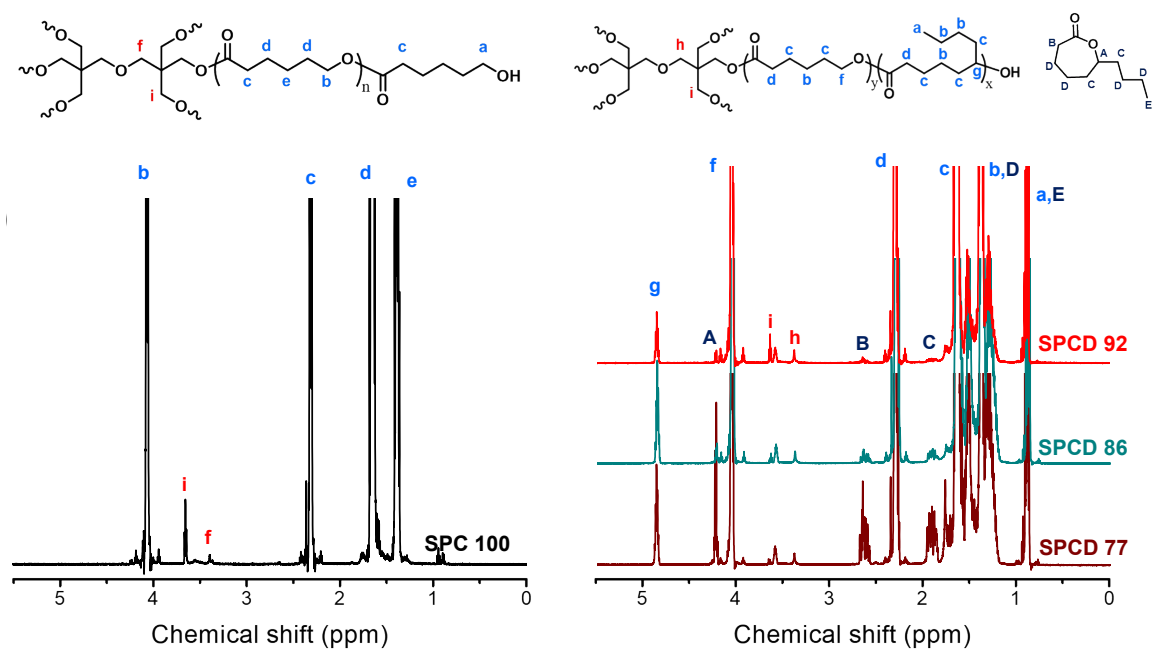

(b)

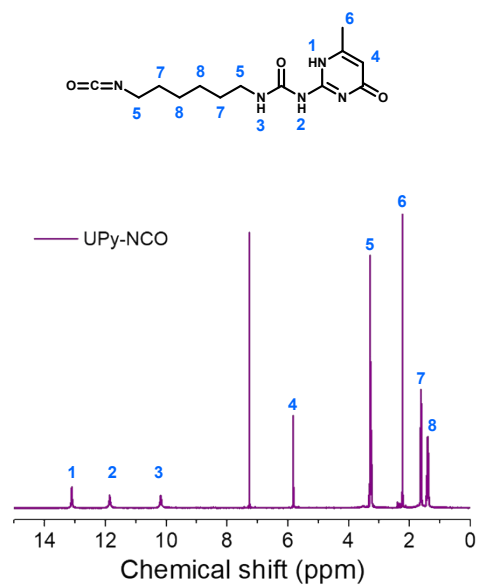

**Figure S2.** <sup>1</sup>H NMR spectra of a) SPCD100 (black line), USPCD92 (red line), USPCD86 (dark cyan line), USPCD77 (brown line), and b) UPy-NCO with proton resonance peak assignment.

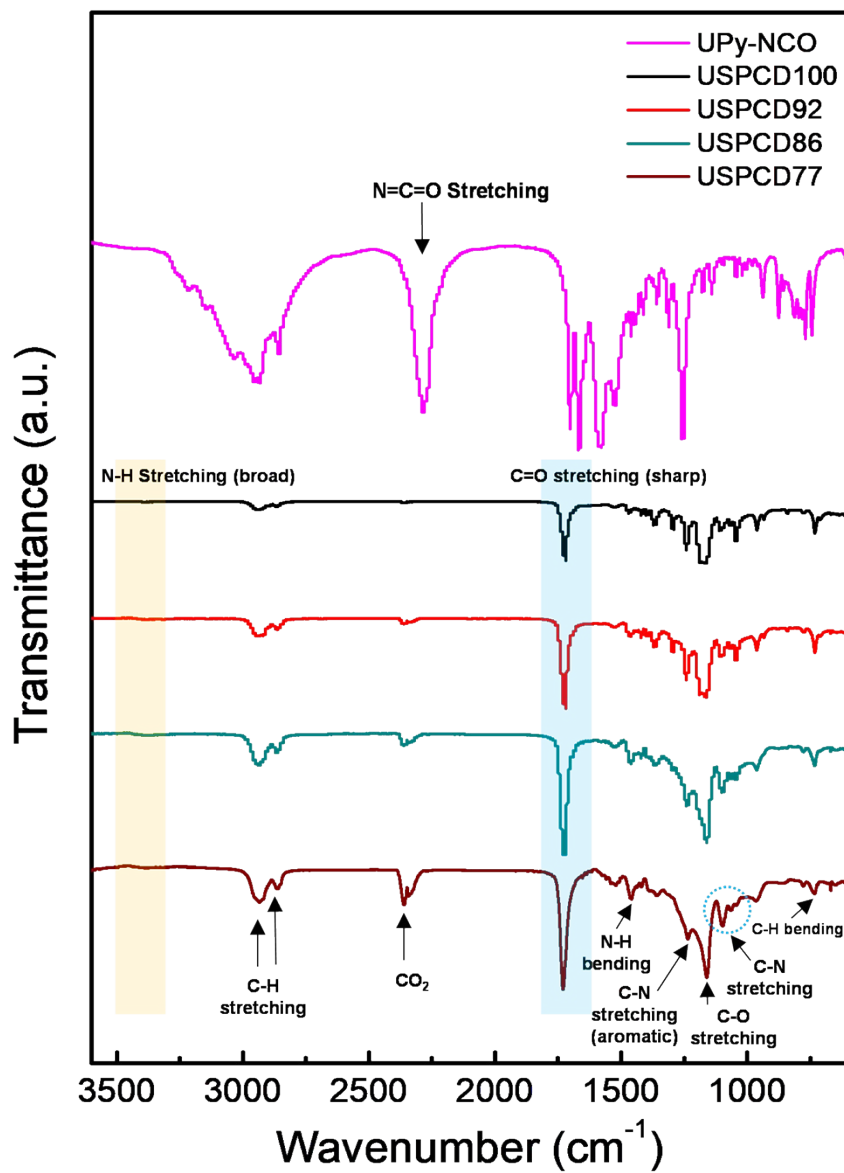

**Figure S3.** ATR FT-IR spectra of the prepared USPCD series.

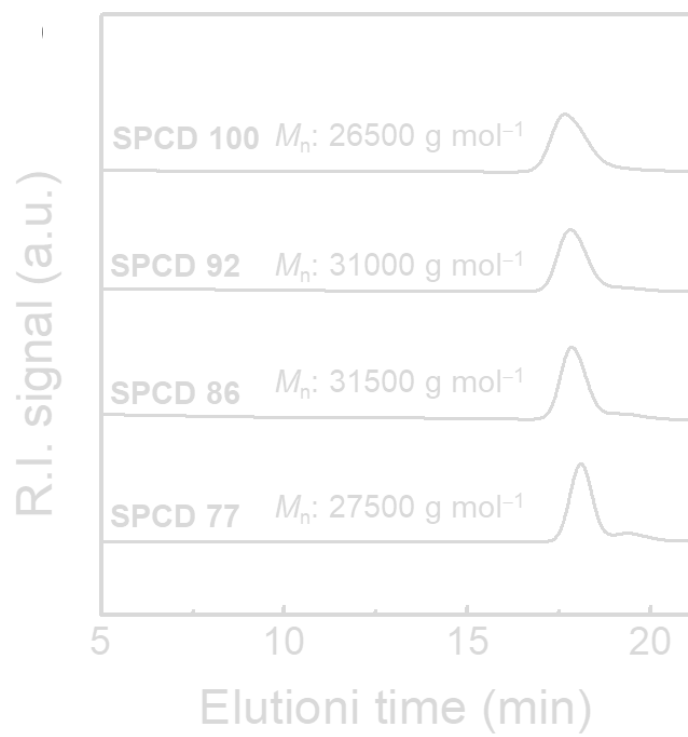

**Figure S4.** Size exclusion chromatography (SEC) traces of the prepared SPCD series.

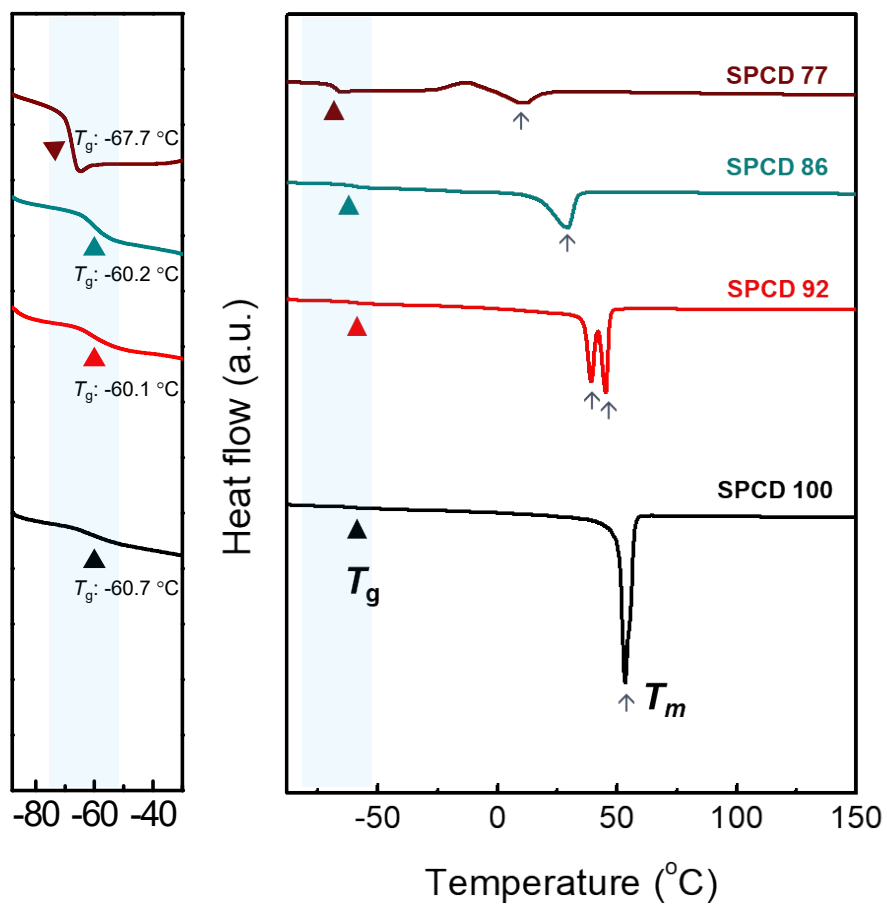

**Figure S5.** DSC thermograms of the SPCDs acquired during the second heating scan.

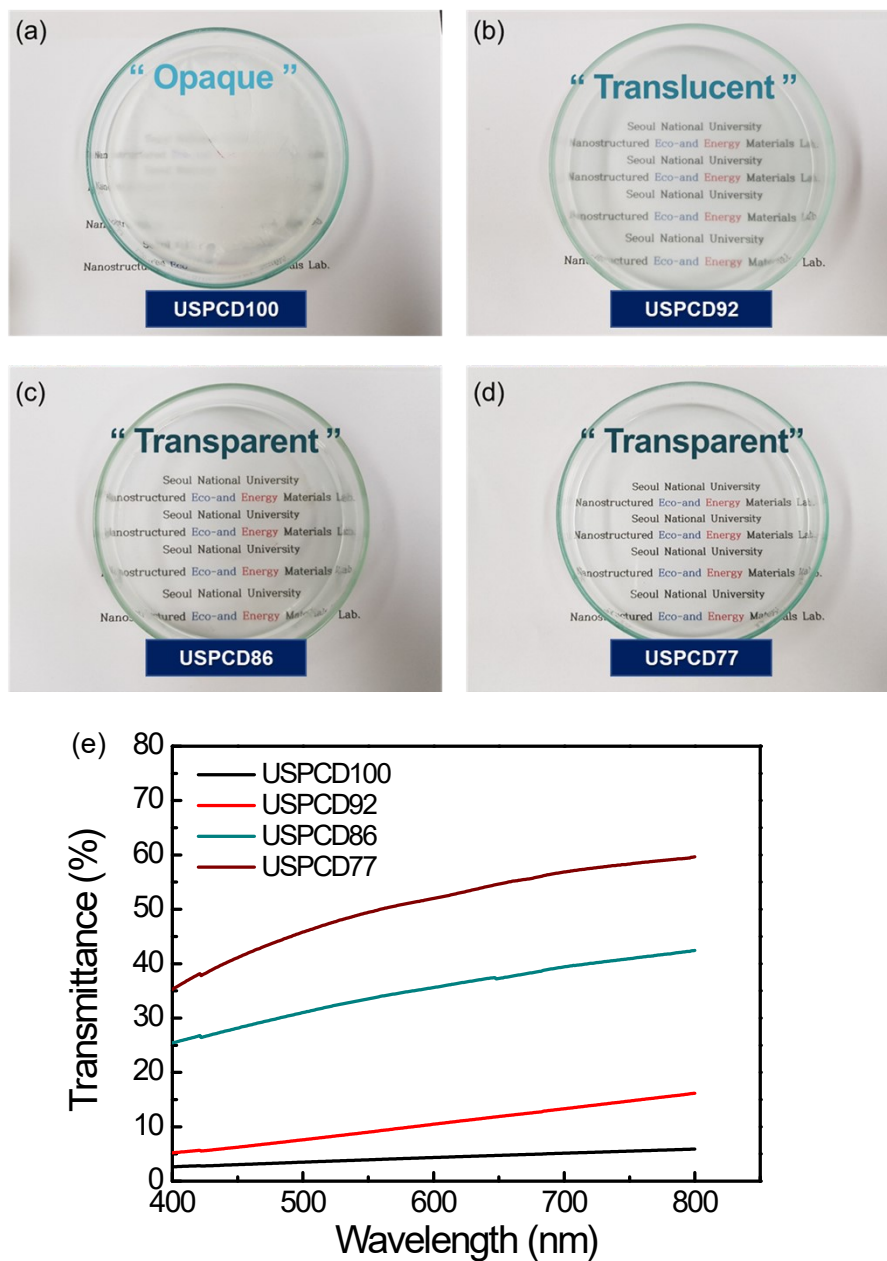

**Figure S6.** Photographs of solution-casted pristine films of a) USPCD100, b) USPCD92, c) USPCD86, and d) USPCD77. As the arm-chain content of  $\epsilon$ -DL increased, a more transparent film of USPCD was formed. e) UV-vis light transmittance for the pristine USPCD series. For all the experimental samples, the sample thickness was estimated as  $\sim 0.5$  nm.



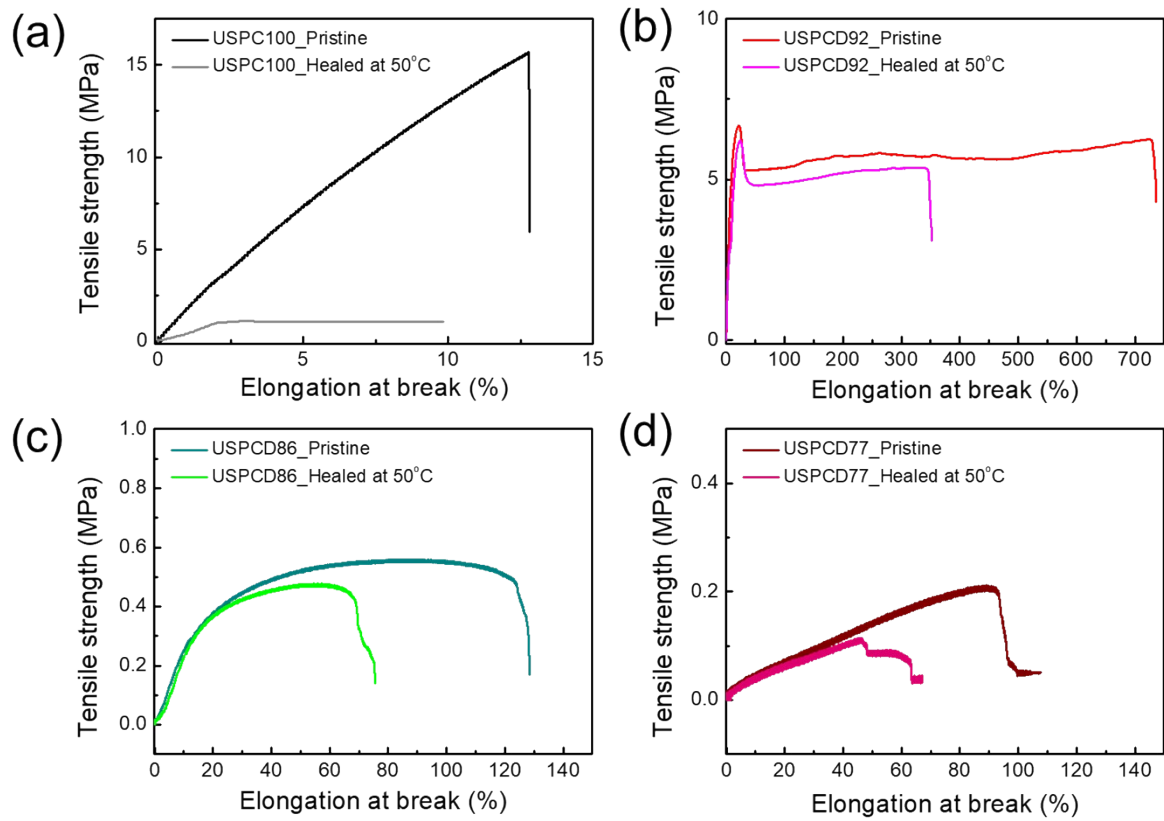

**Figure S7.** Representative stress–strain curves of the pristine and healed USPCDs: a) USPCD100; b) USPCD92; c) USPCD86; d) USPCD77.

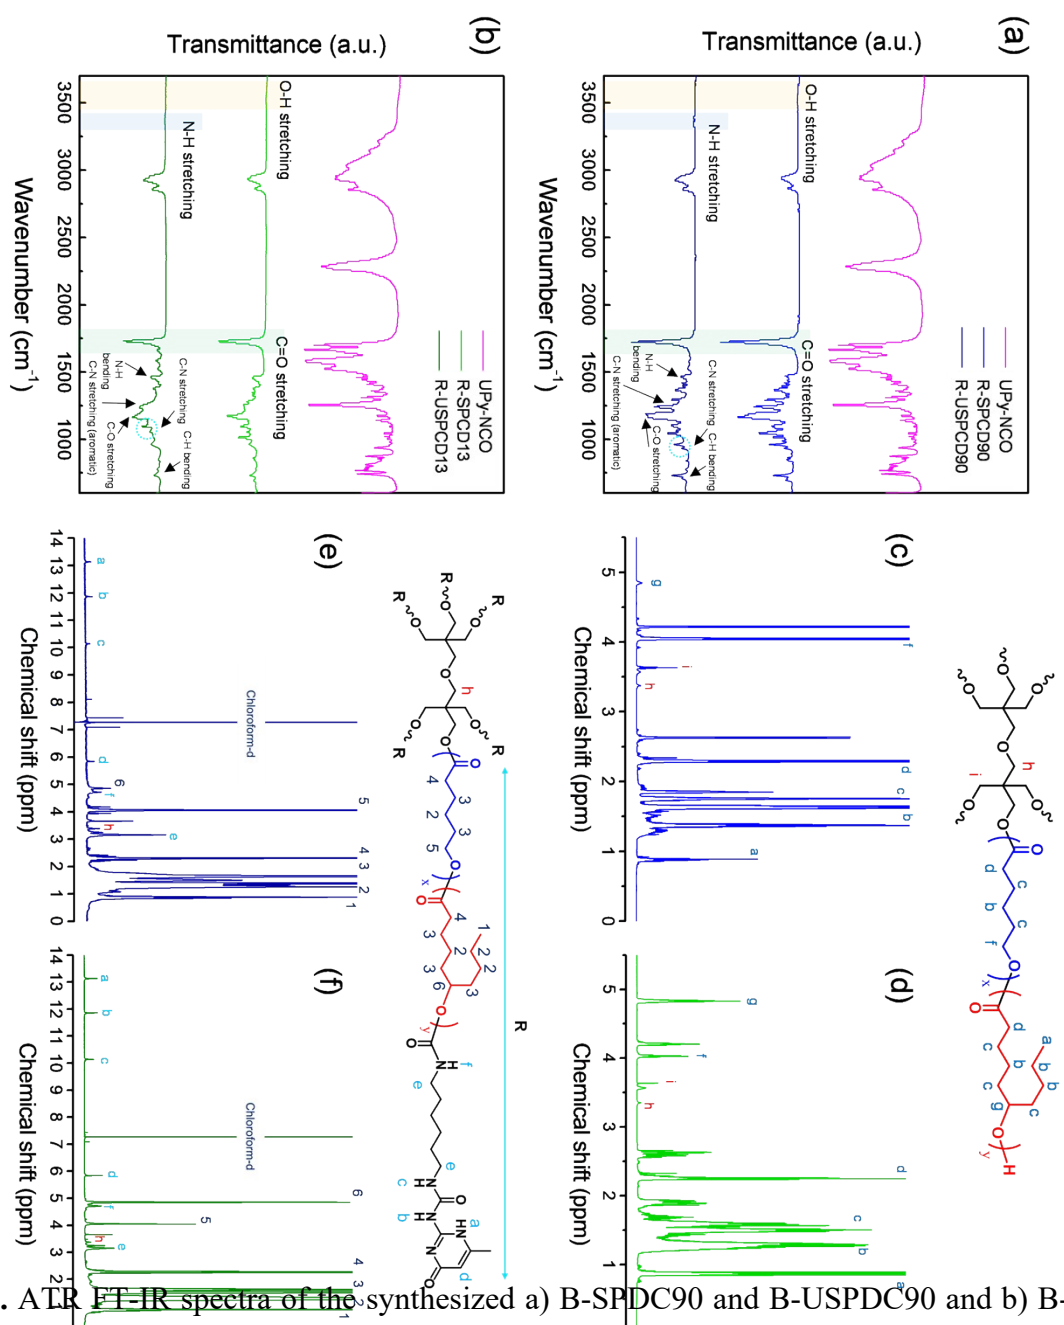

**Figure S8.** ATR-FT-IR spectra of the synthesized a) B-SPDC90 and B-USPDC90 and b) B-SPDC13 and B-USPDC13 samples, showing their characteristic stretching peaks. <sup>1</sup>H NMR spectra of the synthesized c) B-SPDC90, d) B-SPDC13 e) B-USPDC90, and f) B-USPDC13 samples with the resonance peak assignment.

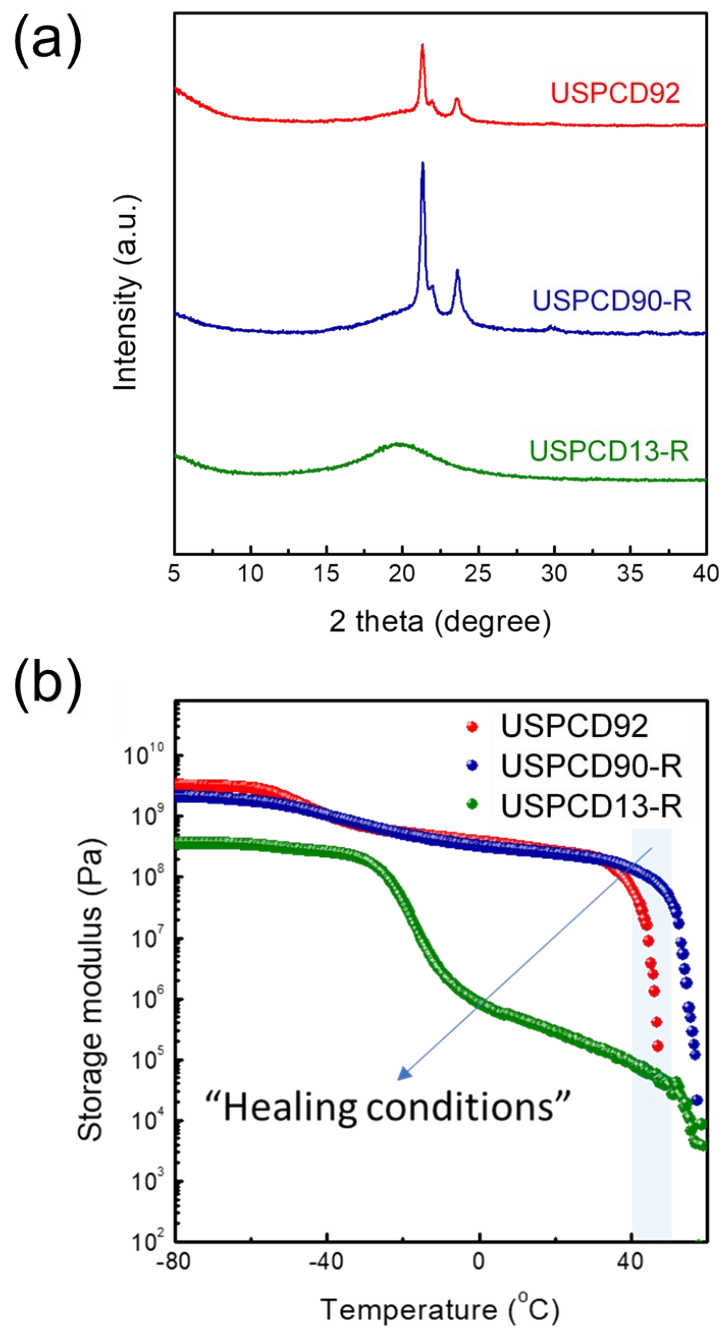

**Figure S9.** a) WXR D patterns of USPCD92, USPCD90-R, and USPCD13-R at room temperature. b) Storage modulus curves of USPCD92, USPCD90-R, and USPCD13-R with respect to the temperature based on DMA.

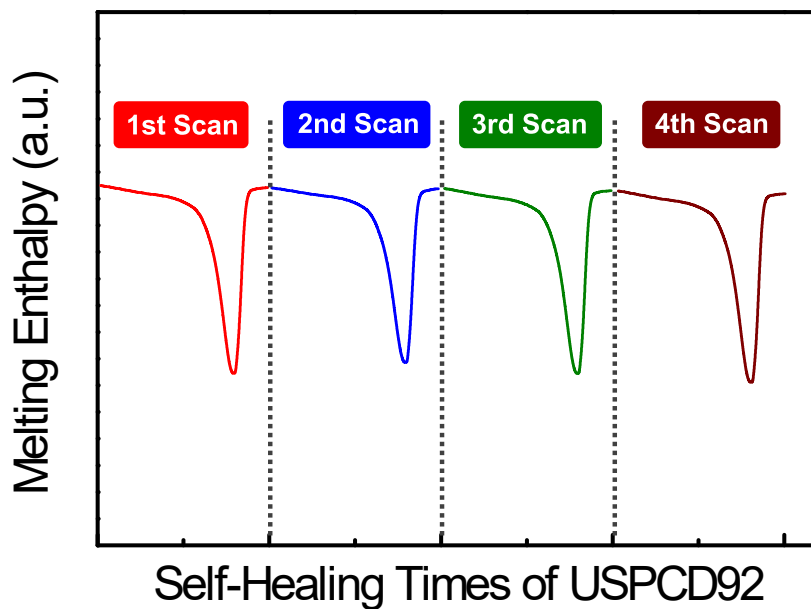

**Figure S10.** Recovery of crystalline melting enthalpy for USPCD92 after four DSC heating scans. Each experiment was performed after the temperature was reduced to 0 °C at a rate of 10 °C min<sup>-1</sup> and then increased to 50 °C (i.e., self-healing temperature), followed by an isothermal step for 10 min (i.e., self-healing time).

**Table S1.** Molecular characteristics of UPy-end-functionalized star poly( $\epsilon$ -caprolactone-co- $\epsilon$ -decalactone)s (USPCDs)

| Sample <sup>a</sup> | Feed molar ratio<br>(mmol)<br>([ $\epsilon$ -CL] / [ $\epsilon$ -DL] /<br>[DPTOL]) | $DP_{arm}$ | Chain<br>composition<br>(mol%)<br>( $DP_{CL}$ : $DP_{DL}$ ) | UPy-end<br>functionality<br>(%) | $M_{n,NMR}$<br>(g/mol) | $M_{n,GPC}$<br>(g/mol) | $M_w/M_n$ |
|---------------------|------------------------------------------------------------------------------------|------------|-------------------------------------------------------------|---------------------------------|------------------------|------------------------|-----------|
| <b>USPCD 100</b>    | 180 / 0 / 1                                                                        | 32.33      | 100 : 0                                                     | 92.3                            | 24000                  | 48500                  | 1.45      |
| <b>USPCD 92</b>     | 162 / 18 / 1                                                                       | 34.24      | 92 : 8                                                      | 95.2                            | 26200                  | 43700                  | 1.45      |
| <b>USPCD 86</b>     | 144 / 36 / 1                                                                       | 33.13      | 86 : 14                                                     | 95.1                            | 26300                  | 40200                  | 1.49      |
| <b>USPCD 77</b>     | 126 / 54 / 1                                                                       | 29.90      | 77 : 23                                                     | 93.6                            | 24700                  | 32200                  | 1.39      |

**Table S2.** Molecular characteristics of SPCDs

| Sample          | $DP_{arm}$ | $DP_{CL}$ | $DP_{DL}$ | $M_{n,NMR}$<br>(g/mol) | $M_{n,GPC}$<br>(g/mol) | $M_w/M_n$ |
|-----------------|------------|-----------|-----------|------------------------|------------------------|-----------|
| <b>SPCD 100</b> | 32.33      | 193.98    | 0         | 22400                  | 26500                  | 1.62      |
| <b>SPCD 92</b>  | 34.24      | 190.26    | 15.18     | 24600                  | 31000                  | 1.25      |
| <b>SPCD 86</b>  | 33.13      | 168.54    | 30.24     | 24650                  | 31500                  | 1.18      |
| <b>SPCD 77</b>  | 29.90      | 138.24    | 41.16     | 23040                  | 27500                  | 1.10      |

**Table S3.** Thermal characteristics of SPCDs

| Sample         | $T_g$ ( $^{\circ}C$ ) | $T_m$ ( $^{\circ}C$ ) | $\Delta H_m$ (J/g) | $T_c$ ( $^{\circ}C$ ) | $\Delta H_c$ (J/g) |
|----------------|-----------------------|-----------------------|--------------------|-----------------------|--------------------|
| <b>SPCD100</b> | -60.74                | 53.47                 | 62.87              | 28.30                 | 63.32              |
| <b>SPCD92</b>  | -60.08                | 39.25/45.37           | 39.15              | 16.98                 | 46.26              |
| <b>SPCD86</b>  | -60.15                | 29.50                 | 23.61              | -14.92                | 30.77              |
| <b>SPCD77</b>  | -67.64                | 11.28                 | 10.41              | -                     | -                  |

**Table S4.** Thermal characteristics of the synthesized USPCDs

| Sample   | $T_g$ (°C) | $T_m$ (°C) | $\Delta H_m$ (J/g) | $T_c$ (°C)    | $\Delta H_c$ (J/g) |
|----------|------------|------------|--------------------|---------------|--------------------|
| USPCD100 | -55.92     | 53.64      | 45.96              | 26.78         | 51.51              |
| USPCD92  | -55.12     | 38.87      | 24.67              | -4.23         | 28.28              |
| USPCD86  | -57.94     | 21.93      | 14.61              | -33.18/-23.93 | 12.78/3.20         |
| USPCD77  | -57.85     | n.a.       | n.a.               | n.a.          | n.a.               |

**Table S5.** Macroscopic mechanical properties of the prepared USPCDs

| Sample   | Tensile strength $\sigma$ (MPa) | Elongation at break $\varepsilon$ (%) | Tensile toughness $\eta$ (MJ m <sup>-3</sup> ) |
|----------|---------------------------------|---------------------------------------|------------------------------------------------|
| USPCD100 | 14.35 ± 3.43                    | 12.44 ± 1.55                          | 0.99 ± 0.38                                    |
| USPCD92  | 6.94 ± 0.45                     | 722.19 ± 13.35                        | 43.89 ± 3.97                                   |
| USPCD86  | 0.69 ± 0.24                     | 149.51 ± 19.60                        | 0.79 ± 0.19                                    |
| USPCD77  | 0.23 ± 0.10                     | 145.21 ± 24.24                        | 0.22 ± 0.07                                    |

**Table S6.** Repulsion parameters ( $a_{ij}$ ) based on Flory–Huggins parameters

|   | M     | A     | B     | C     | H     |
|---|-------|-------|-------|-------|-------|
| M | 25.00 | 26.01 | 25.02 | 28.03 | 50.89 |
| A |       | 25.00 | 26.27 | 25.39 | 37.48 |
| B |       |       | 25.00 | 28.43 | 51.37 |
| C |       |       |       | 25.00 | 33.91 |
| H |       |       |       |       | 25.00 |

**Table S7.** Molecular characteristics of USPCD92 and its experimental counterparts

| Sample <sup>a</sup> | Feed molar ratio (mmol)<br>( [ε-CL] / [ε-DL] /<br>[DPTOL] ) | $DP_{\text{arm}}$ | Chain composition<br>(mol%)<br>( $DP_{\text{CL}} : DP_{\text{DL}}$ ) | UPy-end<br>functionality<br>(%) | $M_{\text{n, NMR}}$<br>(g/mol) |
|---------------------|-------------------------------------------------------------|-------------------|----------------------------------------------------------------------|---------------------------------|--------------------------------|
| <b>USPCD92</b>      | 162 / 18 / 1                                                | 34.24             | 92 : 8                                                               | 95.2                            | 26200                          |
| <b>USPCD90-R</b>    | 162 / 18 / 1                                                | 34.08             | 90 : 10                                                              | 91                              | 26300                          |
| <b>USPCD13-R</b>    | 18 / 162 / 1                                                | 30.62             | 13 : 87                                                              | 93                              | 31800                          |

**Table S8.** Thermal and mechanical properties of USPCD92 and its experimental counterparts

| Sample <sup>a</sup> | $T_{\text{g}}$ (°C) | $T_{\text{m}}$ (°C) | $\Delta H_{\text{m}}$ (J/g) | Tensile strength<br>$\sigma$ (MPa) | Elongation at<br>break $\epsilon$ (%) |
|---------------------|---------------------|---------------------|-----------------------------|------------------------------------|---------------------------------------|
| <b>USPCD 92</b>     | -55.12              | 38.87               | 24.67                       | $6.94 \pm 0.45$                    | $722.19 \pm 13.35$                    |
| <b>USPCD90-R</b>    | -56.58              | 48.81               | 40.45                       | $3.19 \pm 0.45$                    | $7.02 \pm 1.01$                       |
| <b>USPCD13-R</b>    | -44.04              | -                   | -                           | $0.14 \pm 0.01$                    | $292.88 \pm 26.11$                    |
